# Supplementary material for: First microsatellite markers for the pine catkin sawfly Xyela concava (Hymenoptera, Xyelidae) and their application in phylogeography and population genetics
Source: PeerJ. 2019 Nov 13;7:e8010. doi: 10.7717/peerj.8010 (PMC6858820; doi:10.7717/peerj.8010)
Supplement: Table S2 — Unique specimen identifier (DEI-GISHym). Allele sizes in base pairs (bp). Empty cells indicate no amplification [file peerj-07-8010-s002.xlsx]

## Sheet: Supplemental Table S2
DEI-GISHym	collection site	AG_30887_445	AG_30887_046	AG_30887_083	AG_30887_188	AG_30887_479	AG_30887_193	AG_30887_234	AG_30887_282	AG_30887_286	AG_30887_179	AG_30887_460	AG_30887_347	AG_30887_393	AG_30887_414	AG_30887_012	AG_30887_223
10461	Big Burro Mts	90	210	184	182	102	119	376	254	109	114	90	246	139	173	136
10461	Big Burro Mts	90	210	184	182	102	119	376	254	109	114	90	246	139	173	136
10462	Big Burro Mts	87	207	178	182	99	119	382	254	115	111	90	243	142	170	139
10462	Big Burro Mts	87	207	178	182	99	119	382	254	115	111	90	243	142	170	139
10463	Big Burro Mts	87	204	178	182	99	119	400	254	115	111	90	243	136	170	139	135
10463	Big Burro Mts	87	204	178	182	99	119	400	254	115	111	90	243	136	170	139	135
10464	Big Burro Mts	87	210	187	182	99	119	376	239	109	114	90	246	139	140	136
10464	Big Burro Mts	87	210	187	182	99	119	376	239	109	114	90	246	139	140	136
10465	Big Burro Mts	87	210	184	182	99	119	376	239	109	111	90	246	139	173	133
10465	Big Burro Mts	87	210	184	182	99	119	376	239	109	111	90	246	139	173	133
10466	Big Burro Mts	87	207	187	182	99	122	382	257	115	117	90	243	136	170	133	135
10466	Big Burro Mts	87	207	187	182	99	122	382	257	115	117	90	243	136	170	133	135
10467	Big Burro Mts	93	207	178	182	99	122	400	257	115	111	90	237	142	170	133	135
10467	Big Burro Mts	93	207	178	182	99	122	400	257	115	111	90	237	142	170	133	135
10468	Big Burro Mts	93	207	187	182	99	122	400	257	115	117	90	237	136	170	139
10468	Big Burro Mts	93	207	187	182	99	122	400	257	115	117	90	237	136	170	139
10469	Big Burro Mts	90	219	187	185	99	119	388	254	109	111	90	246	139	173	136	129
10469	Big Burro Mts	90	210	187	185	99	119	388	254	109	111	90	246	139	173	136	129
10470	Big Burro Mts	93	204	178	182	99	119	382	257	115	117	90	243	142	173	133
10470	Big Burro Mts	93	204	178	182	99	119	382	257	115	117	102	243	142	173	133
10471	Big Burro Mts	84	207	178	188	102	119	394	245	106	111	90	243	151	152	130	177
10471	Big Burro Mts	84	207	178	188	102	119	394	245	106	111	90	243	151	152	130	177
10473	Big Burro Mts	84	195	178	182	99	119	388	254	103	111	90	243	139	158	136	159
10473	Big Burro Mts	90	216	187	185	99	122	394	257	115	111	96	246	175	173	136	159
10474	Big Burro Mts	84	213	178	179	99	113	376	254	103	111	90	243	157	149	133	135
10474	Big Burro Mts	90	216	178	182	102	122	400	260	109	111	100	243	160	161	133	177
10475	Big Burro Mts	84	213	184	182	99	119	376	254	109	111	90	246	136	152	133	123
10475	Big Burro Mts	84	225	184	185	99	122	394	254	115	111	90	246	139	155	136	159
32419	Big Burro Mts	75	198	184	179	96	122	376	257	112	114	116	243	139	173	148	126
32419	Big Burro Mts	75	213	187	179	99	134	382	263	112	114	116	246	139	179	148	126
32420	Big Burro Mts	84	216	190	185	102	116	382	248	115	111	90	237	142	143	133	123
32420	Big Burro Mts	84	216	190	185	102	116	382	248	115	111	94	237	142	143	133	123
32420.5	Big Burro Mts	75	198	184	179	96	122	376	257	112	114	116	243	139	173	148	126
32420.9	Big Burro Mts	75	213	187	179	99	134	382	263	112	114	116	246	139	179	148	126
32422	Big Burro Mts	75	198	184	179	96	122	376	257	112	114	116	243	139	173	148	126
32421.7	Big Burro Mts	75	213	187	179	99	134	382	263	112	114	116	246	139	179	148	126
32423	Big Burro Mts	75	198	184	179	96	122	376	257	112	114	116	243	139	173	148	126
32422.8	Big Burro Mts	75	213	187	179	99	134	382	263	112	114	116	246	139	179	148	126
32424	Big Burro Mts	75	198	184	179	96	122	376	257	112	114	116	243	139	173	148	126
32424	Big Burro Mts	75	213	187	179	99	122	382	263	112	114	116	246	139	179	148	126
32424.5	Big Burro Mts	75	198	184	179	96	122	376	257	112	114	116	243	139	173	148	126
32424.9	Big Burro Mts	75	213	187	179	99	134	382	263	112	114	116	246	139	179	148	126
32426	Big Burro Mts	75	198	184	179	96	122	376	257	112	114	116	243	139	173	148	126
32426	Big Burro Mts	75	213	187	179	99	134	382	263	112	114	116	246	139	179	148	126
32429	Big Burro Mts	75	198	184	179	96	122	376	257	112	114	116	243	139	173	148	126
32429	Big Burro Mts	75	213	187	179	99	134	382	263	112	114	116	246	139	179	148	126
32431	Big Burro Mts	78	198	181	185	96	119	376	254	106	111	90	237	136	143	133	12
32431	Big Burro Mts	78	216	187	185	102	131	376	257	121	111	90	249	136	149	148	123
32432	Big Burro Mts	75	198	184	179	96	122	376	257	112	114	116	243	139	173	148	126
32432	Big Burro Mts	75	213	187	179	99	134	382	263	112	114	116	246	139	179	148	126
32434	Big Burro Mts	84	210	184	182	99	113	394	251	106	117	90	237	139	146	133	159
32434	Big Burro Mts	84	219	184	182	99	119	412	251	121	117	90	237	139	155	133	174
32998	Big Burro Mts	75	198	184	179	96	122	376	257	112	114	116	243	139	173	148	126
32998	Big Burro Mts	75	213	187	179	99	134	382	263	112	114	116	246	139	179	148	126
32999	Big Burro Mts	87	198	187	185	102	116	388	254	115	111	90	243	139	122	133	12
32999	Big Burro Mts	87	198	187	185	102	116	388	254	115	111	90	243	139	122	133	12
32446	Monitor Pass	84	198	184	179	93	110	394	257	109	117	90	237	142	161	133	174
32446	Monitor Pass	84	198	184	179	93	110	394	257	109	117	90	237	142	161	133	174
32447	Monitor Pass	81	201	187	182	99	119	394	251	115	111	90	237	142	152	133	186
32447	Monitor Pass	87	219	187	185	99	119	424	257	121	123	90	246	157	164	136	186
32447.5	Monitor Pass	90	201	184	185	99	113	388	251	109	111	90	237	139	146	136	183
32447.9	Monitor Pass	90	201	184	185	99	113	388	251	109	111	90	237	139	146	136	183
32449	Monitor Pass	81	195	184	182	99	110	388	251	115	111	90	243	142	146	133	126
32449	Monitor Pass	84	210	187	182	99	113	394	251	121	117	90	246	157	152	136	177
32449.5	Monitor Pass	84	201	184	182	99	113	394	251	109	111	90	237	139	143	133	126
32450	Monitor Pass	90	213	184	182	99	113	424	257	109	111	90	246	157	155	133	18
32451	Monitor Pass	84	207	184	182	93	119	394	257	106	111	90	237	139	143	133	126
32451	Monitor Pass	90	219	184	185	99	125	394	257	109	111	90	237	142	164	136	162
32452	Monitor Pass	81	195	184	182	99	110	388	251	115	111	90	243	142	146	133	177
32452	Monitor Pass	84	210	187	182	99	119	394	251	121	117	90	246	157	152	136	186
32453	Monitor Pass	84	210	184	182	99	110	388	263	109	111	90	237	139	146	136	177
32453	Monitor Pass	84	213	187	182	99	122	394	263	121	111	90	243	139	173	136	183
32454	Monitor Pass	81	207	184	182	99	110	394	251	109	111	90	237	139	155	136	126
32454	Monitor Pass	84	210	187	185	99	125	394	251	112	111	90	246	157	155	136	183
32455	Monitor Pass	75	210	184	182	99	113	394	251	109	111	90	237	139	152	133	177
32455	Monitor Pass	81	213	184	185	99	119	394	257	121	117	90	237	139	164	133	177
32456	Monitor Pass	84	204	184	182	93	110	388	251	109	111	90	237	136	152	133	144
32456	Monitor Pass	84	213	184	182	99	119	394	251	109	111	90	237	163	173	136	174
32457	Monitor Pass	75	213	184	182	99	113	394	251	109	111	90	237	139	152	133	177
32457	Monitor Pass	81	213	184	185	99	119	394	257	121	117	90	237	139	164	133	177
32460	Monitor Pass	84	198	184	182	99	119	394	257	109	111	90	237	157	146	136	174
32460	Monitor Pass	84	198	184	182	99	119	394	257	109	111	90	237	157	146	136	174
32461	Monitor Pass	81	210	184	182	93	125	394	251	109	111	90	243	139	164	136	183
32461	Monitor Pass	81	210	184	182	93	125	394	251	109	111	90	243	139	164	136	183
32462	Monitor Pass	84	207	187	182	93	110	394	251	106	111	90	237	139	146	133	129
32462	Monitor Pass	90	210	187	182	96	110	394	254	115	126	90	243	139	152	133	132
32463	Monitor Pass	75	210	184	182	99	110	376	257	109	111	90	243	136	155	133	144
32463	Monitor Pass	84	210	184	185	99	110	394	257	121	111	90	246	136	173	133	183
32465	Monitor Pass	84	210	184	182	99	110	376	254	121	111	90	243	136	173	133	144
32465	Monitor Pass	84	213	184	185	99	110	394	257	121	111	90	246	157	173	133	183
32466	Monitor Pass	75	210	184	182	99	110	376	257	109	111	90	243	136	173	133	159
32466	Monitor Pass	84	210	184	185	99	119	394	257	121	111	90	246	157	173	133	183
32467	Monitor Pass	75	210	184	185	93	110	394	251	109	123	90	246	139	152	136	159
32467	Monitor Pass	75	210	184	185	93	110	394	251	109	123	90	246	139	152	136	159
32626	Monitor Pass	90	210	184	185	102	119	388	254	109	111	90	246	139	173	133	129
32626	Monitor Pass	90	210	184	185	102	119	388	254	109	111	90	246	139	173	133	129
32628	Monitor Pass	90	210	187	182	102	119	388	254	109	111	90	246	139	173	136
32628	Monitor Pass	90	210	187	182	102	119	388	254	109	111	90	246	139	173	133
32633	Monitor Pass	87	204	187	182	99	119	382	254	115	111	90	243	136	170	139
32633	Monitor Pass	87	204	187	182	99	119	382	254	115	111	90	243	136	170	139
32634	Monitor Pass	87	207	184	182	102	119	388	239	109	114	90	246	139	140	136
32634	Monitor Pass	87	207	184	182	102	119	388	239	109	114	90	246	139	140	136
32635	Monitor Pass	87	207	184	185	102	119	388	254	109	111	90	246	139	173	136
32635	Monitor Pass	87	207	184	185	102	119	388	254	109	111	90	246	139	173	136
32640	Monitor Pass	87	207	187	185	99	119	376	239	109	111	90	246	139	173	136
32640	Monitor Pass	87	207	187	185	99	119	376	239	109	111	90	246	139	173	136
32647	Monitor Pass	87	207	178	182	99	122	400	254	115	117	90	237	136	170	133	135
32647	Monitor Pass	87	207	178	182	99	122	400	254	115	117	90	237	136	170	133	135
32651	Monitor Pass	93	207	178	182	99	122	382	257	115	117	90	243	136	173	133
32651	Monitor Pass	93	207	178	182	99	122	382	257	115	117	102	243	136	173	133
32652	Monitor Pass	90	213	178	179	99	113	376	257	109	111	90	243	136	149	136	147
32652	Monitor Pass	90	216	184	182	99	122	394	260	115	111	100	243	157	161	136	177
32653	Monitor Pass	90	213	178	179	99	113	376	257	109	111	92	243	157	149	133	135
32653	Monitor Pass	90	216	184	182	99	122	394	260	115	111	100	243	160	149	136	177
32654	Monitor Pass	84	213	178	179	99	113	376	257	109	111	92	243	136	149	133	147
32654	Monitor Pass	90	216	178	182	99	119	394	260	115	111	100	243	157	149	136	177
32861	Uinta Mts	84	207	184	182	99	110	394	251	109	111	90	237	136	152	136	162
32861	Uinta Mts	90	210	184	185	99	122	394	257	121	117	108	237	142	152	136	162
32862	Uinta Mts	90	210	184	185	99	110	394	257	109	111	90	246	136	152	133	144
32862	Uinta Mts	90	210	184	185	99	110	394	257	109	111	90	246	136	152	133	144
32863	Uinta Mts	84	207	184	182	99	122	394	251	109	111	90	237	142	152	136	162
32863	Uinta Mts	90	210	184	185	99	125	412	257	121	111	108	237	157	152	136	162
32864	Uinta Mts	84	207	184	182	99	110	394	251	115	111	90	237	136	152	136	162
32864	Uinta Mts	90	210	184	185	99	122	394	257	121	117	90	237	142	152	136	162
32865	Uinta Mts	75	207	184	179	96	110	394	251	109	111	90	243	136	146	133	177
32865	Uinta Mts	84	210	187	185	99	119	394	257	121	111	90	246	139	152	133	18
32866	Uinta Mts	75	213	184	182	96	113	388	251	109	111	90	243	139	143	133	162
32866	Uinta Mts	75	219	187	185	99	119	394	251	121	111	90	243	139	173	133	183
32867	Uinta Mts	84	207	184	182	99	122	394	251	115	111	90	237	136	152	133	162
32867	Uinta Mts	90	210	184	185	99	125	412	257	121	111	108	237	142	152	136	162
32868	Uinta Mts	75	210	184	182	93	113	388	251	109	111	90	237	139	143	133	159
32868	Uinta Mts	87	210	184	185	99	119	388	251	109	111	90	237	163	155	133	159
32869	Uinta Mts	84	213	184	182	99	110	394	257	109	111	90	237	142	143	133	18
32869	Uinta Mts	90	213	187	185	99	113	394	257	109	117	90	243	142	146	136	183
32870	Uinta Mts	84	213	184	182	99	110	394	251	109	111	90	237	142	143	133	18
32870	Uinta Mts	90	219	187	185	99	116	394	257	109	117	90	243	142	146	136	183
32871	Uinta Mts	81	210	184	182	99	110	388	251	109	111	90	237	157	152	133	144
32871	Uinta Mts	84	219	187	182	99	119	412	257	115	126	90	243	157	161	133	159
32872	Uinta Mts	84	210	184	185	99	110	394	257	121	111	90	246	157	152	136	159
32872	Uinta Mts	84	210	184	185	99	110	394	257	121	111	90	246	157	152	136	159
32873	Uinta Mts	75	210	184	182	99	110	382	251	106	111	90	243	139	143	133	12
32873	Uinta Mts	87	219	187	182	99	122	424	254	121	111	90	246	139	152	136	174
32874	Uinta Mts	81	207	184	182	93	113	394	251	112	111	90	237	139	152	133	132
32874	Uinta Mts	84	210	184	182	99	119	394	257	112	120	90	246	157	173	136	144
32875	Uinta Mts	84	207	184	182	99	113	394	254	109	120	90	237	139	152	133	132
32875	Uinta Mts	84	210	184	182	99	119	394	257	112	120	90	246	139	173	136	144
32876	Uinta Mts	75	198	184	182	93	110	388	257	109	111	90	243	139	152	133	159
32876	Uinta Mts	81	219	187	182	99	110	394	257	115	111	90	243	157	152	136	174
32877	Uinta Mts	90	210	184	182	93	110	424	257	109	120	90	246	157	152	133
32877	Uinta Mts	90	210	184	182	93	110	424	257	109	120	90	246	157	152	133
32878	Uinta Mts	75	207	184	182	99	119	382	251	106	111	90	246	139	143	133	12
32878	Uinta Mts	87	210	187	182	99	122	424	254	121	111	90	246	139	152	136	12
32879	Uinta Mts	75	207	184	182	99	110	382	251	106	111	90	243	139	143	133	12
32879	Uinta Mts	90	210	184	182	99	122	424	254	121	111	90	246	139	152	136	12
32880	Uinta Mts	84	198	184	185	99	119	394	251	121	111	90	237	157	152	136	174
32880	Uinta Mts	84	198	184	185	99	119	394	251	121	111	90	237	157	152	136	174
32881	Uinta Mts	93	207	178	182	99	119	382	257	115	111	90	243	136	173	133	135
32881	Uinta Mts	93	207	178	182	99	119	382	257	115	111	102	243	136	173	133	135
32882	Uinta Mts	87	210	187	185	102	119	388	239	109	111	90	246	139	140	136	129
32882	Uinta Mts	87	210	187	185	102	119	388	239	109	111	90	246	139	140	136	129
32883	Uinta Mts	84	195	184	182	99	122	388	254	103	111	90	243	139	158	136	159
32883	Uinta Mts	90	213	187	185	99	122	394	257	115	111	96	246	139	173	136	159
32884	Uinta Mts	75	198	184	179	96	122	376	257	112	114	116	243	139	173	148	126
32884	Uinta Mts	75	213	187	179	99	134	382	263	112	114	116	246	139	179	148	126
32885	Uinta Mts	75	198	184	179	96	122	376	257	112	114	116	243	139	173	148	126
32885	Uinta Mts	75	213	187	179	99	134	382	263	112	114	116	246	139	179	148	126
32886	Uinta Mts	75	198	184	179	96	122	376	257	112	114	116	243	139	173	148	126
32886	Uinta Mts	75	213	187	179	99	134	382	263	112	114	116	246	139	179	148	126
32887	Uinta Mts	75	198	184	179	96	122	376	257	112	114	116	243	139	173	148	126
32887	Uinta Mts	75	213	187	179	99	134	382	263	112	114	116	246	139	179	148	126
32888	Uinta Mts	75	195	187	185	96	116	376	248	106	111	90	243	136	143	133	12
32888	Uinta Mts	78	216	190	185	102	122	388	254	118	111	94	249	136	143	133	12
32889	Uinta Mts	75	198	184	179	96	122	376	257	112	114	116	243	139	173	148	126
32889	Uinta Mts	75	213	187	179	99	134	382	263	112	114	116	246	139	179	148	126
32890	Uinta Mts	75	198	184	179	96	122	376	257	112	114	116	243	139	173	148	126
32890	Uinta Mts	75	213	187	179	99	134	382	263	112	114	116	246	139	179	148	126
32891	Uinta Mts	75	198	184	179	96	122	376	257	112	114	116	243	139	173	148	126
32891	Uinta Mts	75	213	187	179	99	134	382	263	112	114	116	246	139	179	148	126
32892	Uinta Mts	75	198	184	179	96	122	376	257	112	114	116	243	139	173	148	126
32892	Uinta Mts	75	213	187	179	99	134	382	263	112	114	116	246	139	179	148	126
32893	Uinta Mts	75	198	184	179	96	122	376	257	112	114	116	243	139	173	148	126
32893	Uinta Mts	75	213	187	179	99	134	382	263	112	114	116	246	139	179	148	126
32894	Uinta Mts	75	198	184	179	96	122	376	257	112	114	116	243	139	173	148	126
32894	Uinta Mts	75	213	187	179	99	134	382	263	112	114	116	246	139	179	148	126
32895	Uinta Mts	75	198	184	179	96	122	376	257	112	114	116	243	139	173	148	126
32895	Uinta Mts	75	213	187	179	99	134	382	263	112	114	116	246	139	179	148	126
32896	Uinta Mts	75	198	184	179	96	122	376	257	112	114	116	243	139	173	148	126
32896	Uinta Mts	75	213	187	179	99	134	382	263	112	114	116	246	139	179	148	126
32897	Uinta Mts	75	198	184	179	96	122	376	257	112	114	116	243	139	173	148	126
32897	Uinta Mts	75	213	187	179	99	134	382	263	112	114	116	246	139	179	148	126
32898	Uinta Mts	75	198	184	179	96	122	376	257	112	114	116	243	139	173	148	126
32898	Uinta Mts	75	213	187	179	99	134	382	263	112	114	116	246	139	179	148	126
32899	Uinta Mts	75	198	184	179	96	122	376	257	112	114	116	243	139	173	148	126
32899	Uinta Mts	75	213	187	179	99	134	382	263	112	114	116	246	139	179	148	126
32900	Uinta Mts	87	216	190	185	99	116	388	254	115	111	90	246	136	152	133	120
32900	Uinta Mts	87	216	190	185	99	116	388	254	115	111	90	246	136	152	133	120
